# Supplementary material
Source: HighWire-hosted journal article supplement (https://erj.ersjournals.com/highwire/filestream/113796/field_highwire_adjunct_files/0/Figure_E1.pdf)
Supplement: Figure_E1.pdf [file Figure_E1.pdf]

At the time the deep-vein thrombosis or pulmonary embolism occurred:

|                                                                                            |               |                         |               |
|--------------------------------------------------------------------------------------------|---------------|-------------------------|---------------|
| - Was this shortly after surgery?                                                          | Yes           | No                      | I do not know |
| - Were you already diagnosed with asthma?                                                  | Yes           | No                      | I do not know |
| - Did you use contraceptive treatment at that time?                                        | Yes           | No                      | I do not know |
| - Did you use postmenopausal hormone replacement therapy at that time?                     | Yes           | No                      | I do not know |
| - Did you use corticosteroid treatment at that time?                                       | Yes           | No                      | I do not know |
| 2. Are there any relatives in your family with deep-vein thrombosis or pulmonary embolism? | Yes           | No                      | I do not know |
| If Yes,                                                                                    |               |                         |               |
| Sister/Brother                                                                             | Mother/Father | Grandmother/Grandfather | Aunt/Uncle    |

3. Was there ever investigated if there was a genetic susceptibility for deep-vein thrombosis or pulmonary embolism?

    If Yes,  
    Was this genetic susceptibility increased?

4. Did you use chronic oral corticosteroid treatment? (Examples of corticosteroid treatment are: prednisone, prednisolon, dexamethason, betamethason, celestone, cortisone, hydrocortisone)

    If Yes,  
    What is the dosage you use every day? \_\_\_\_\_ mg/day

5. How many oral corticosteroid bursts did you receive in the previous 12 months? \_\_\_\_\_

If you are female, could you please also answer the last question:

6. Did you ever use the contraceptive medication?

    If Yes,  
    For how many years did you use this medication \_\_\_\_\_ years

Did you ever use postmenopausal hormone replacement therapy?

    If Yes,  
    For how many years did you use this medication \_\_\_\_\_ years

For example: Cilest, Evra, Femodeen, Marvelon, Mercilon, Microgynon '20', '30' of '50', Ministat, Minulet, Modicon, Neocon, Stediril '30', Trigynon, Trinordiol, Trinovum, Yasmin, Yaz, Mirena-spiraal, Nuvaring, Dagynil, Estradiol, Estrofem, Lynoral, Livial, Progynova, Synapause-E3, Zumenon, Meno-implant of Estradiol-pleisters, System-pleisters

**We thank your for your time and cooperation to fill in this questionnaire!**
